# Supplementary material
Source: HighWire-hosted journal article supplement (https://www.jneurosci.org/highwire/filestream/598771/field_highwire_adjunct_files/1/suppl_mat_1.pdf)
Supplement: suppl_mat_1.pdf [file suppl_mat_1.pdf]

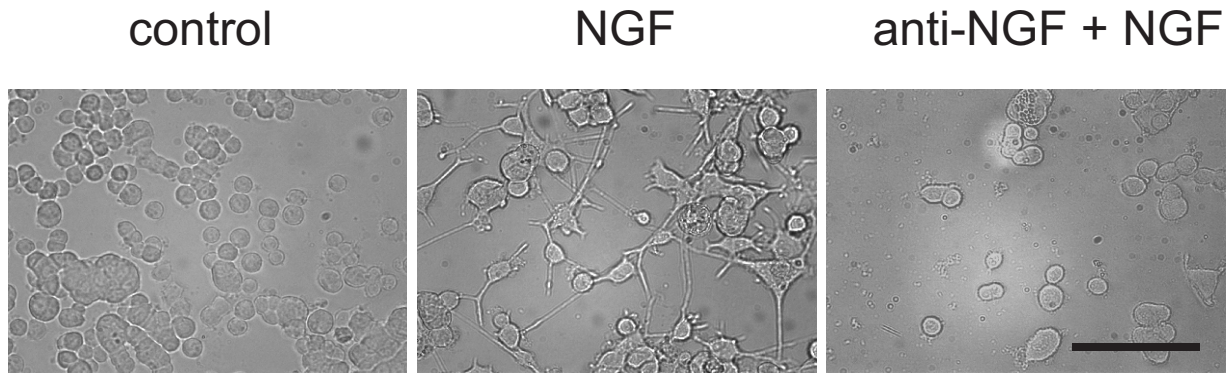

**Supplemental Figure 1.** Anti-NGF antibody inhibits the development of NGF-induced processes in PC12 cells. Photographs show PC12 cells cultured in control conditions (left panel), or with NGF (50 ng/ml; middle) or in the presence of NGF plus anti-NGF antibody for 10 days (right). Cells grown with NGF shows neuronal processes (85 % of cells displayed processes  $50 \pm 37$   $\mu\text{m}$  long,  $n = 210$ ), while they are absent in the presence of anti-NGF antibody (< 10 % of cells displayed processes  $13 \pm 5$   $\mu\text{m}$  long). Calibration bar = 50  $\mu\text{m}$ .
